# Supplementary material
Source: PubMed Central journal article supplement (PMC3677304)
Supplement: mt201359x1.pdf [file mt201359x1.pdf]

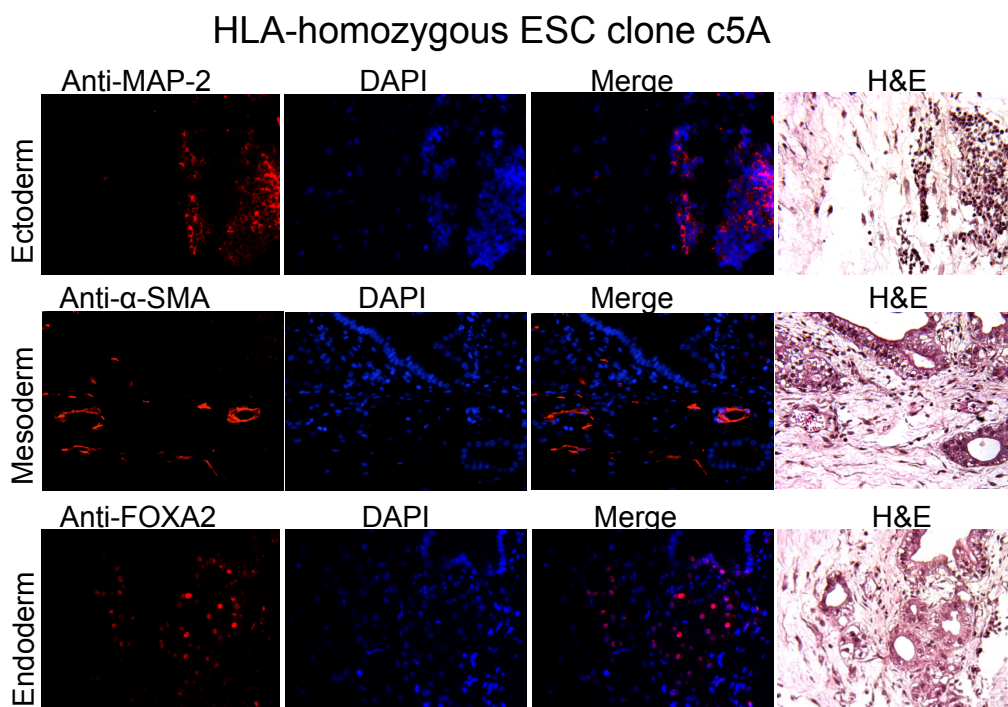

**Supplemental Figure 1. Trilineage teratoma formation in HLA-homozygous ESC clone c5A.** Teratomas derived from clone c5A were stained with the indicated antibodies or DAPI and examined by fluorescence microscopy. Serial sections are shown stained with hematoxylin and eosin (H&E). MAP-2, Microtubule Associated Protein-2.  $\alpha$ -SMA (alpha-Smooth Muscle Actin). FOXA2, Forkhead Box Protein A2. Scale bars = 100 microns.

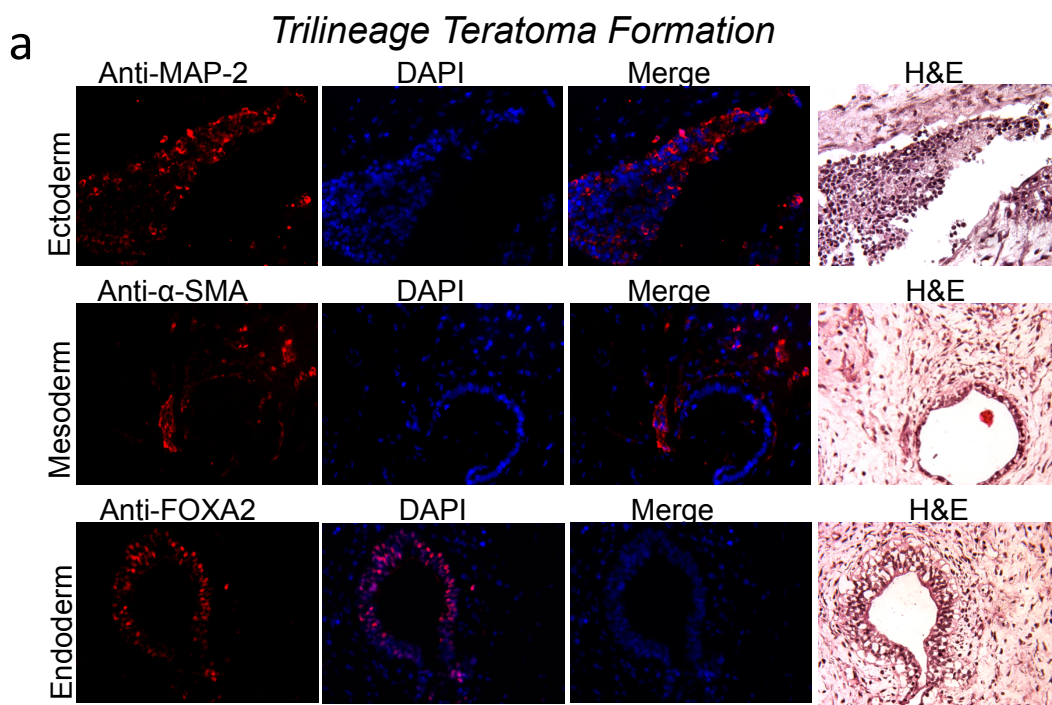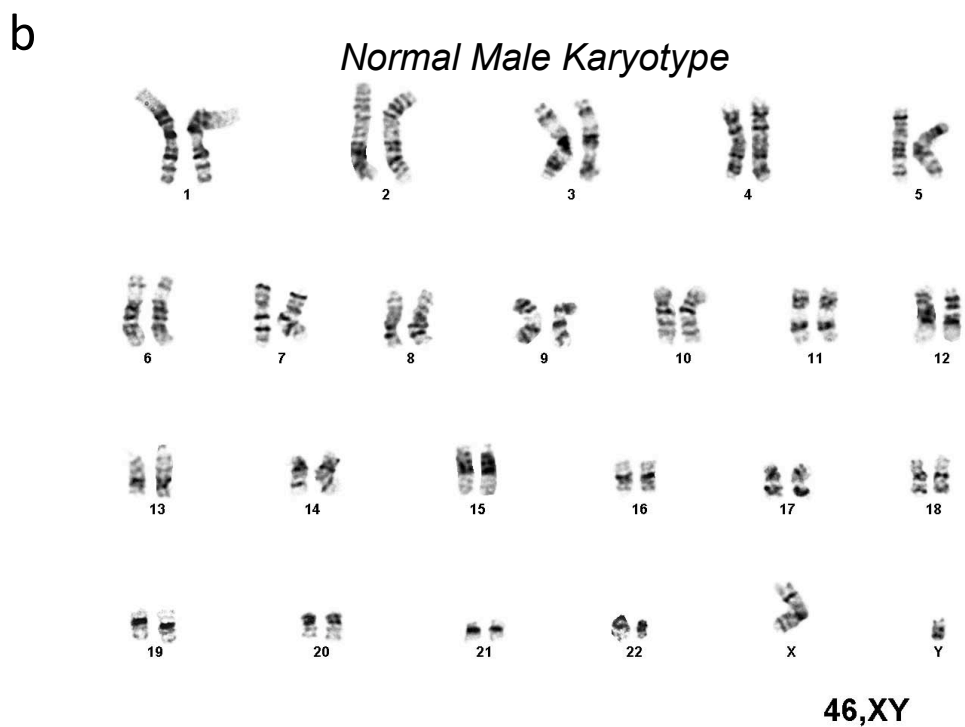

**Supplemental Figure 2. Trilineage teratoma formation and normal karyotype of  $B2M^{loxP/loxP}$  cells.** (a) Teratoma produced by Cre'd out  $B2M^{loxP/loxP}$  HLA class I-negative clone c1 stained with the indicated antibodies or DAPI and examined by fluorescence microscopy. Serial sections are shown stained with hematoxylin and eosin (H&E). MAP-2, Microtubule Associated Protein-2.  $\alpha$ -SMA (alpha-Smooth Muscle Actin). FOXA2, Forkhead Box Protein A2. Scale bars = 100 microns. (b) Karyotype of the same clone. Five out of five spreads examined were normal male cells.

**Supplemental Table 1. *HMGA1* targeting and GCV-resistant clone analysis.**

| Cell line | Hyg-R clones                                  | Targeted clones                                     | GCV-R subclones                                                      | <i>HMGA1</i> probe                           | HyTK probe                                                        | HLA type                                     | Presumed basis for GCV resistance                                                                                  |
|-----------|-----------------------------------------------|-----------------------------------------------------|----------------------------------------------------------------------|----------------------------------------------|-------------------------------------------------------------------|----------------------------------------------|--------------------------------------------------------------------------------------------------------------------|
| H1        | 5                                             | 5                                                   | c1A-L<br>c2A<br>c4A,B<br>c4C-H<br>c5A                                | WT<br>Targeted<br>Targeted<br>Targeted<br>WT | Missing<br>Targeted<br>New band<br>Targeted<br>Missing            | Hetero<br>NA<br>NA<br>NA<br>Homo             | Gene conversion<br>HyTK mutation<br>HyTK rearrangement<br>HyTK point mutation<br>Mitotic recombination             |
| H7        | 5                                             | 4                                                   | NA                                                                   |                                              |                                                                   |                                              |                                                                                                                    |
| BG01      | 3<br>pc1<br>pc2<br>pc3<br>pc4<br>pc5<br>pc6   | 3<br>100%<br>100%<br>58%<br>100%<br>100%<br>100%    | NA<br>pc1A-N<br>pc1O,P<br>pc2A-D<br>pc3A,B<br>pc4A,B<br>pc5A-C<br>NA | WT<br>Targeted<br>WT<br>WT<br>WT<br>WT       | Missing<br>Targeted<br>New band<br>New band<br>Missing<br>Missing | Hetero<br>NA<br>NA<br>NA<br>Hetero<br>Hetero | Gene conversion<br>HyTK mutation<br>HyTK rearrangement<br>HyTK rearrangement<br>Gene conversion<br>Gene conversion |
| BG02      | pc1<br>pc2<br>pc3<br>pc4<br>pc5<br>pc6<br>pc7 | 100%<br>100%<br>38%<br>100%<br>100%<br>100%<br>100% | pc1A-J<br>pc1A<br>NA<br>NA<br>NA<br>pc1A<br>NA                       | WT<br>WT<br><br><br>WT                       | Missing<br>New band<br><br><br>Missing                            | Hetero<br>NA<br><br><br>Hetero               | Gene conversion<br>HyTK rearrangement<br><br><br>Gene conversion                                                   |
| BG03      | 14                                            | 14                                                  | c1A,B                                                                | Targeted                                     | Targeted                                                          | NA                                           | HyTK mutation                                                                                                      |

**Supplemental Table 2. B2M targeting experiments.**

| Cell line | Allele 1 vector  | MOI    | Total CFU | # G418 <sup>R</sup> CFU                               | % G418 <sup>R</sup> CFU                                            | G418 <sup>R</sup> CFU/infected cell                                                                        | # G418 <sup>R</sup> CFU screened | # G418 <sup>R</sup> CFU targeted | % G418 <sup>R</sup> CFU targeted | % Total CFU targeted | Targeted CFU/infected cell |
|-----------|------------------|--------|-----------|-------------------------------------------------------|--------------------------------------------------------------------|------------------------------------------------------------------------------------------------------------|----------------------------------|----------------------------------|----------------------------------|----------------------|----------------------------|
| H1        | AAV2-B2M-ETKNpA  | 20,000 | 1575      | 291<br>345<br>336<br>298                              | 18.5<br>21.9<br>21.3<br>18.9                                       | 1.9E-04<br>2.3E-04<br>2.2E-04<br>2.0E-04                                                                   | 30                               | 9                                | 30.0                             | 6.1                  | 6.35E-05                   |
| H1        | none             | 0      | 1575      | 0                                                     | <0.06                                                              | 0                                                                                                          |                                  |                                  |                                  |                      |                            |
| Cell line | Allele 2 vector  | MOI    | Total CFU | Hyg <sup>R</sup> CFU                                  | % Hyg <sup>R</sup> CFU                                             | Hyg <sup>R</sup> CFU/infected cell                                                                         | # Hyg <sup>R</sup> CFU screened  | # Hyg <sup>R</sup> CFU targeted  | % Hyg <sup>R</sup> CFU targeted  | % Total CFU targeted | Targeted CFU/infected cell |
| C23-2     | AAV3-B2M-EHyTKpA | 2,000  | 450       | 7<br>8<br>10<br>11<br>16<br>10<br>8<br>14<br>19<br>14 | 1.6<br>1.8<br>2.2<br>2.4<br>3.6<br>2.2<br>1.8<br>3.1<br>4.2<br>3.1 | 1.4E-05<br>1.6E-05<br>2.0E-05<br>2.2E-05<br>3.2E-05<br>2.0E-05<br>1.6E-05<br>2.8E-05<br>3.8E-05<br>2.8E-05 | 60                               | 6                                | 10.0                             | 0.26                 | 2.34E-06                   |
| C23-2     | none             | 0      | 450       | 0                                                     | <0.2                                                               | 0                                                                                                          |                                  |                                  |                                  |                      |                            |

*Abbreviations:* CFU, colony-forming unit; Hyg, Hygromycin; MOI, multiplicity of infection.
